# Supplementary material
Source: Royal Society of Chemistry journal article supplement (doi:10.1039/d5an01270h)
Supplement: d5an01270h1.pdf [file d5an01270h1.pdf]

## Supplementary Information

### One-step digestion-ligation-activation universal strategy for ultrasensitive detection of DNA methylation

Shiyong Zhou <sup>a1</sup>, Tao Gu <sup>a1</sup>, Liyuan Deng <sup>a</sup>, Xianfeng Wang<sup>c</sup>, Shuyu Zhu <sup>a</sup>, Xinyu He <sup>a</sup>, Mei Yang <sup>a</sup>, Danqun Huo <sup>a\*</sup>, Changjun Hou <sup>a,b\*</sup>

<sup>a</sup>Key Laboratory for Biorheological Science and Technology of Ministry of Education, Bioengineering College of Chongqing University, Chongqing 400044, PR China.

<sup>b</sup>Chongqing Key Laboratory of Bio-perception & Intelligent Information Processing, School of Microelectronics and Communication Engineering, Chongqing University, Chongqing, 400044, PR China

<sup>c</sup>Wuxi School of Medicine, Jiangnan University, Wuxi 214122, PR China.

\* Corresponding author, E-mail: huodq@cqu.edu.cn; houcj@cqu.edu.cn.

Shiyong Zhou and Tao Gu contributed equally to this work.

## 2 Experimental Section

### 2.1 Materials and apparatus

All the oligonucleotides listed in Table S1 were synthesized by Sangon Biotech (Shanghai, China). Betaine, dNTPs, TE buffer and DEPC-treated water were supplied by Sangon Biotech (Shanghai, China). Ezup Column Animal Genomic DNA Purification Kit and PAGE related reagents (Agarose, Acryl/Bis 30% Solution (29:1), nucleic acid stain, TBE buffers, loading buffers and DNA marker) were supplied by Sangon Biotech (Shanghai, China). RNase-Free ddH<sub>2</sub>O was purchased from Tiangen. T4 DNA ligase, HhaI and Bst 2.0 DNA polymerase were obtained from New England Biolabs (USA). BstUI was available from Thermo scientific. Cas12a (Cpf1) was obtained from Guangzhou Meige Biological Technology.

**Table S1 The DNA sequences used in this study**

| Name                | Sequence (5'-3' direction)                                                                                                                               |
|---------------------|----------------------------------------------------------------------------------------------------------------------------------------------------------|
| Methylated target   | GCAGTTGGGCTCmCGmCGmCGTGGAGCAGCAGCAGCTCCGC-NH <sub>2</sub>                                                                                                |
| Unmethylated target | GCAGTTGGGCTCCGCGCCGTGGAGCAGCAGCAGCTCCGC-NH <sub>2</sub>                                                                                                  |
| padlock probe       | P-<br>CTGCTCCACGGCGCGGAGCCTTTTCGACACGACACGA<br>TTTTGGAACCTGCTCGACGGATTAATAAGAGA<br>TAATAAGAGATTTTGGAGCTGCTG                                              |
| SLP                 | ATCGTCGTGACTGTTTTCCCTAACCTAACCTAACCC<br>TTTTCAGTCACGACGATTTTAATAAGAGATAATAAG<br>AGAT                                                                     |
| FIP                 | CGACACGACACGAAAAAATCCGTCGAGCAGAGTTC<br>C                                                                                                                 |
| BIP<br>crRNA        | ATCGTCGTGACTGTTTTCCCTAACCTAACCTAACCC<br>UAAUUUCUACUAAGUGUAGAUAAUAAGAGAUAAUA<br>AGAGAU                                                                    |
| Random 1            | AAAAAAAAAAAAAAAAAAAAAAAAAACCTCAGCAACC<br>CCTCAGCGCGGAGGGCAGCGGCGAGAAAAA                                                                                  |
| Random 2            | TGGCTGGTGGGCAGCGGGTTCGmCGmCGGAGGGCAG<br>CGGCGAG                                                                                                          |
| Random 3            | GGGCTGCTTCmCGGCTGGTGCCCCC                                                                                                                                |
| Random 4            | CATTGAGCTGmCGGGAGCTGGCACCMCGCTGGGmCG<br>mCGCTGGGAAGGGCmCGCACCMCGGCTGGAGmCGTG<br>CCAAmCGmCGCTGmCGCATmCGmCGmCGGGGCACmC<br>GmCGTGCAACCCACAmCGGCAGCTGGTCCCTG |

“p” and “NH<sub>2</sub>” mean the phosphate and amidogen modification.

DNA and RNA sequences used in this study. CpG methylation sites sensitive to restriction digestion are highlighted in red. The complementary regions between the

padlock probe and target DNA are shown in blue. The green sequence represents the protospacer generated after RLAMP amplification, which is recognized by the crRNA spacer sequence (red) for Cas12a activation.

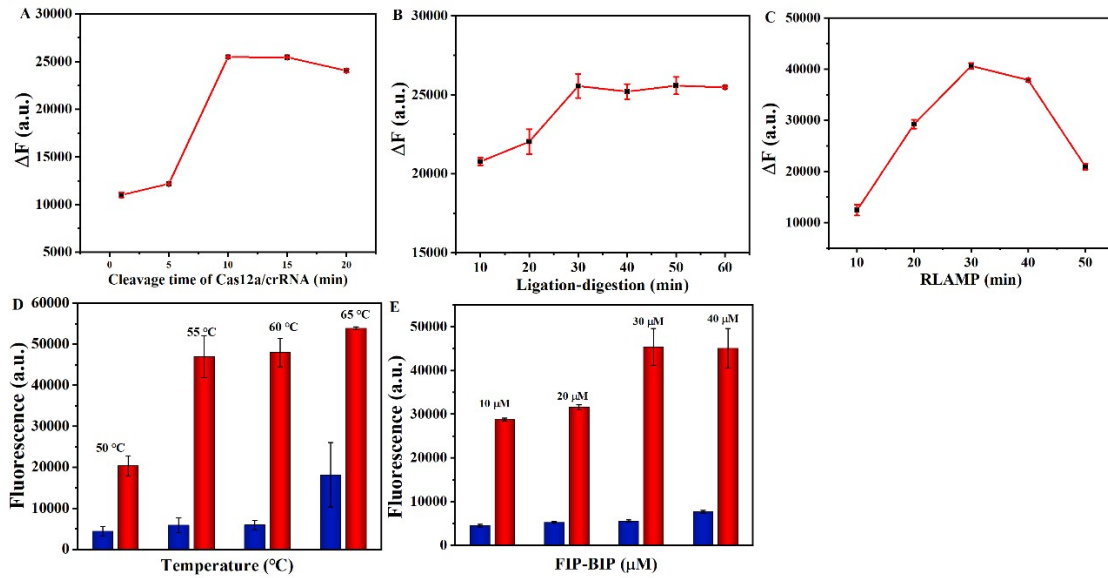

**Figure S1.** Optimizations of DNA methylation detection by the proposed method. (A) Optimization of CRISPR/Cas12a cleavage time; (B) Optimization of simultaneously ligation–digestion reaction time; (C) Optimization of RLAMP amplification time; (D) Optimization of RLAMP reaction temperature; (E) Optimization of inner primer (FIP/BIP) concentration.

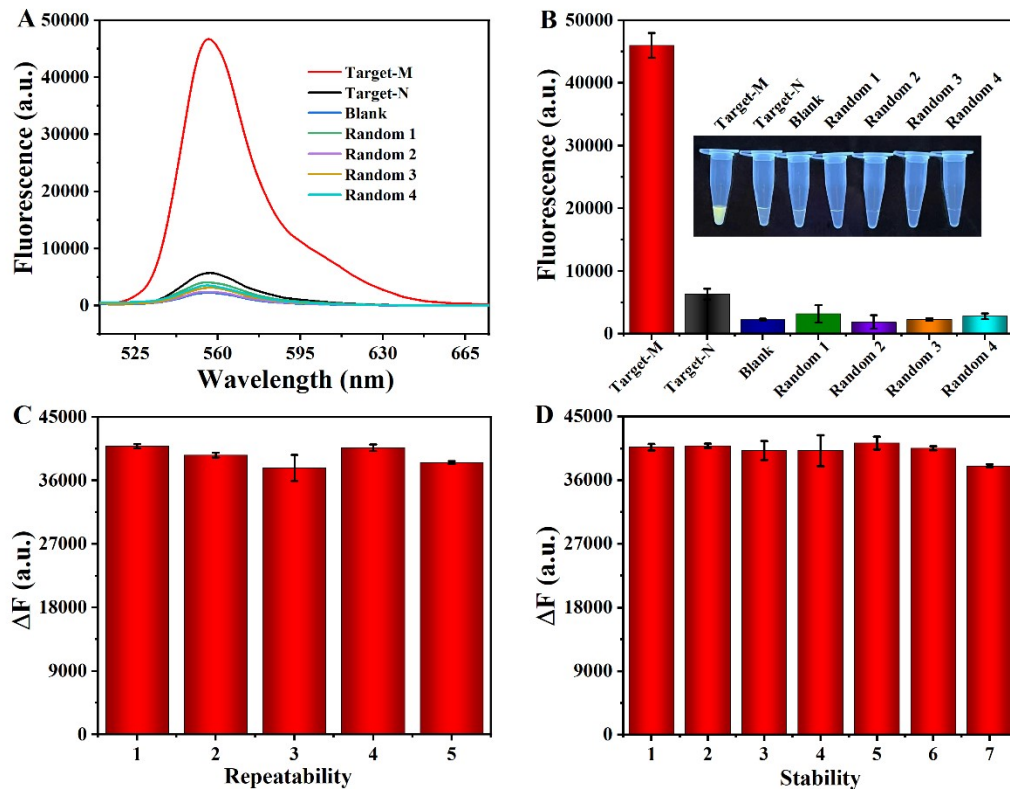

**Figure S2.** Evaluation of analytical performance of the DL-RLAMP/Cas12a assay. (A) Selectivity evaluation toward methylated target DNA; (B) Anti-interference selectivity analysis using non-methylated DNA controls; (C) Repeatability assessment of the DL-RLAMP/Cas12a assay; (D) Stability evaluation.

**Table S2** Comparison with other methods for methylation detection.

| method           | signal amplification                                                                        | detection range                            | LOD                                                              | Ref.      |
|------------------|---------------------------------------------------------------------------------------------|--------------------------------------------|------------------------------------------------------------------|-----------|
| Electrochemistry | Bi <sub>2</sub> S <sub>3</sub> nanorods as photoelectric conversion materials               | 10 <sup>-13</sup> to 10 <sup>-9</sup> M    | 10 <sup>-13</sup> to 10 <sup>-9</sup> M                          | [32]      |
| Electrochemistry | Aminated rGO                                                                                | 50 fM to 100 pM                            | 12 fM                                                            | [33]      |
| Colorimetry      | AuNP-based ligase chain reaction                                                            | 0.01 fM to 1 fM                            | 0.01 fM                                                          | [34]      |
| Colorimetry      | the peroxidase-mimetic activity of mesoporous iron oxide                                    | -                                          | 10%                                                              | [35]      |
| SERS             | wrapped graphene-Ag array                                                                   | 5×10 <sup>-3</sup> – 5 ng μL <sup>-1</sup> | 0.5 ± 0.1 pg μL <sup>-1</sup> (4.5 pmol L <sup>-1</sup> ) (0.1%) | [36]      |
| SERS             | ligase chain reaction                                                                       | 0-500 pM                                   | 0.5 pM                                                           | [37]      |
| Fluorescence     | MutS-Methylation specific PCR                                                               | -                                          | ~(0.5%)                                                          | [38]      |
| Fluorescence     | dendritic DNA nanostructure in combination with ligase reaction                             | 10 <sup>-15</sup> to 10 <sup>-7</sup> M    | 0.4 fM                                                           | [39]      |
| Fluorescence     | DL-RLAMP/Cas12a                                                                             | 2 fM ~ 200 pM                              | 0.18 fM (0.1%)                                                   | this work |
| Electrochemistry | Graphene Oxide Combining with Restriction Endonuclease                                      | 0.1 to 450 U mL <sup>-1</sup>              | (0.05 ± 0.02) U mL <sup>-1</sup> (6 h)                           | [40]      |
| Electrochemistry | quantum dot signaling tracer                                                                | 1 to 100 U·mL <sup>-1</sup>                | 1 U·mL <sup>-1</sup> (3 h)                                       | [41]      |
| Colorimetry      | nicking enzyme amplification and the use of gold nanoparticles conjugated to graphene oxide | 0.2 to 60 U·mL <sup>-1</sup>               | 67 U·mL <sup>-1</sup> (7 h)                                      | [42]      |
| Colorimetry      | PER/functionalized hemin/G-quadruplex DNzyme                                                | 1 to 7.5 U·mL <sup>-1</sup>                | 0.3 U/mL (3 h)                                                   | [43]      |
| SERS             | RCA/silver core-gold satellite nanocomposites                                               | 0.05 – 50 U·mL <sup>-1</sup>               | 2.8×10 <sup>-3</sup> (16.4 h)                                    | [44]      |
| Fluorescence     | Cascade Signal Amplification                                                                | 0.1 – 10 U·mL <sup>-1</sup>                | 0.002 (4h)                                                       | [45]      |
| Fluorescence     | hyperbranched rolling circle amplification                                                  | 2.5–70 U·mL <sup>-1</sup>                  | 1.8 (11 h)                                                       | [46]      |
| Fluorescence     | Methylation blocks cascade displacement amplification                                       | 2–40 U·mL <sup>-1</sup>                    | 0.67 U mL <sup>-1</sup> (90 min)                                 | [47]      |
| Fluorescence     | DL-RLAMP/Cas12a                                                                             | 0 ~ 80 U·mL <sup>-1</sup>                  | 6.92×10 <sup>-4</sup> U mL <sup>-1</sup> 100 min                 | this work |

Assay time represents total experimental duration excluding sample preparation.

- [32] Yin Huanshun, Sun Bing, Zhou Yunlei, Wang Mo, Xu Zhenning, Fu Zhengliang, Ai Shiyun. A new strategy for methylated DNA detection based on photoelectrochemical immunosensor using Bi<sub>2</sub>S<sub>3</sub> nanorods, methyl bonding domain protein and anti-his tag antibody [J]. *Biosensors & Bioelectronics*, 2014, 51: 103-108.
- [33] Safarzadeh Mina, Suhail Ahmed, Sethi Jagriti, Sattar Anas, Jenkins David, Pan Genhua. A Label-Free DNA-Immunosensor Based on Aminated rGO Electrode for the Quantification of DNA Methylation [J]. *Nanomaterials*, 2021, 11(4): 985.
- [34] Su Fengxia, Wang Limei, Sun Yueying, Liu Chenghui, Duan Xinrui, Li Zhengping. Highly sensitive detection of CpG methylation in genomic DNA by AuNP-based colorimetric assay with ligase chain reaction [J]. *Chemical Communications*, 2015, 51(16): 3371-3374.
- [35] Bhattacharjee Ripon, Tanaka Shunsuke, Moriam Sofia, Masud Mostafa Kamal, Lin Jianjian, Alshehri Saad M., Ahamad Tansir, Salunkhe Rahul R., Nam-Trung Nguyen, Yamauchi Yusuke, Hossain Md Shahriar A., Shiddiky Muhammad J. A. Porous nanozymes: the peroxidase-mimetic activity of mesoporous iron oxide for the colorimetric and electrochemical detection of global DNA methylation [J]. *Journal of Materials Chemistry B*, 2018, 6(29): 4783-4791.
- [36] Ouyang Lei, Hu Yaowu, Zhu Lihua, Cheng Gary J., Irudayaraj Joseph. A reusable laser wrapped graphene-Ag array based SERS sensor for trace detection of genomic DNA methylation [J]. *Biosensors & Bioelectronics*, 2017, 92: 755-562.
- [37] Wang Yuling, Wee Eugene J. H., Trau Matt. Highly sensitive DNA methylation analysis at CpG resolution by surface-enhanced Raman scattering via ligase chain reaction [J]. *Chemical Communications*, 2015, 51(54): 10953-10956.
- [38] Zhang Lei, Zhang Wei, Mu Yaoqin, Hu Hao, Dong Kejun, Wen Xu, Ye Zhengxin, Sun Qiangqiang, Yan Bei, Mao Zenghui, Xiao Xianjin. Ultrasensitive and Quantitative DNA Methylation Detection Method Based on the MutS Protein [J]. *Analytical Chemistry*, 2023, 95(51): 18828-18835.
- [39] Zhang Shu, Huang Jian, Lu Jingrun, Liu Min, Li Yan, Fang Lichao, Huang Hui, Huang Jianjun, Mo Fei, Zheng Junsong. A novel fluorescent biosensor based on dendritic DNA nanostructure in combination with ligase reaction for ultrasensitive detection of DNA methylation [J]. *Journal of Nanobiotechnology*, 2019, 17(1): 121.
- [40] Li Wen, Wu Ping, Zhang Hui, Cai Chenxin. Signal Amplification of Graphene Oxide Combining with Restriction Endonuclease for Site-Specific Determination of DNA Methylation and Assay of Methyltransferase Activity [J]. *Analytical Chemistry*, 2012, 84(17): 7583-7590.
- [41] Baek Songyi, Won Byoung Yeon, Park Ki Soo, Park Hyun Gyu. An electrochemical one-step system for assaying methyltransferase activity based on transport of a quantum dot signaling tracer [J]. *Biosensors & Bioelectronics*, 2013, 49: 542-546.
- [42] Li Zhi-Mei, Zhang Xiao, Pi Ting, Bu Jin, Deng Rui-Hong, Chi Bao-Zhu, Zheng Xiang-Juan. Colorimetric determination of the activity of methyltransferase based on nicking enzyme amplification and the use of gold nanoparticles conjugated to graphene oxide [J]. *Microchimica*

Acta, 2019, 186(8): 594.

- [43] Yuan Wenxu, Xiao Kaiting, Liu Xingxing, Lai Yanming, Luo Fazeng, Xiao Wei, Wu Jinjun, Pan Pan, Li Yongkui, Xiao Heng. A programmable DNA nanodevice for colorimetric detection of DNA methyltransferase activity using functionalized hemin/G-quadruplex DNAzyme [J]. *Analytica Chimica Acta*, 2023, 1273: 341559.
- [44] Chen Runzhi, Shi Huayi, Meng Xinyu, Su Yuanyuan, Wang Houyu, He Yao. Dual-Amplification Strategy-Based SERS Chip for Sensitive and Reproducible Detection of DNA Methyltransferase Activity in Human Serum [J]. *Analytical Chemistry*, 2019, 91(5): 3597-3603.
- [45] Liu Yunlong, Tu Yuanbiao, Wu Haiping, Zhang Hang, Chen Honghong, Zhou Guohua, Wang Peng, Gu Yueqing. A renewable DNA biosensor for sensitive detection of DNA methyltransferase activity based on cascade signal amplification [J]. *Sensors and Actuators B-Chemical*, 2020, 313: 128029.
- [46] Chen Liping, Zhang Ying, Xia Qian, Luo Fang, Guo Longhua, Qiu Bin, Lin Zhenyu. Fluorescence biosensor for DNA methyltransferase activity and related inhibitor detection based on methylation-sensitive cleavage primer triggered hyperbranched rolling circle amplification [J]. *Analytica Chimica Acta*, 2020, 1122: 1-8.
- [47] Wen Qilin, Li Dandan, Xi Huai, Huang Guidan, Zhu Wenyuan. Methylation-blocked cascade strand displacement amplification for rapid and sensitive fluorescence detection of DNA methyltransferase activity [J]. *Journal of Pharmaceutical and Biomedical Analysis*, 2022, 219: 114935.
